# Supplementary material for: Selective oxidation of crotyl alcohol by AuxPd bimetallic pseudo-single-atom catalysts
Source: Royal Society of Chemistry journal article supplement (doi:10.1039/d0cy01387k), 2020-01-01
Supplement: d0cy01387k1.pdf [file d0cy01387k1.pdf]

Electronic Supplementary Information

**Selective Oxidation of Crotyl Alcohol by Au<sub>x</sub>Pd Bimetallic Pseudo-Single-Atom Catalysts**

Brandon A. Chivers and Robert W. J. Scott

Department of Chemistry, University of Saskatchewan, 110 Science Place, Saskatoon,

Saskatchewan, S7N 5C9, Canada

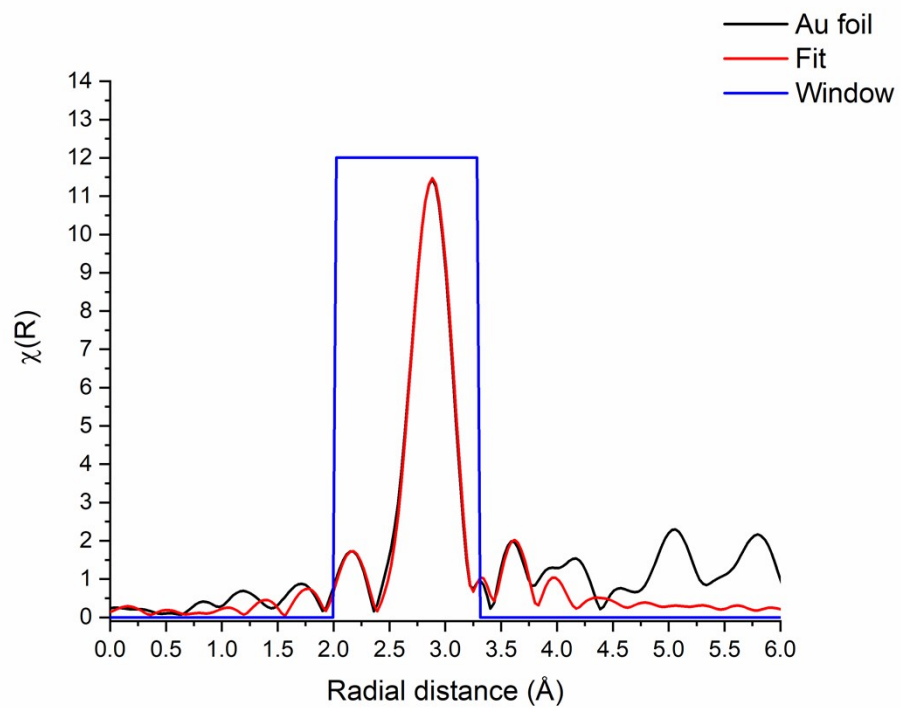

Figure S1. Au L<sub>III</sub>-edge EXAFS fit for Au foil.

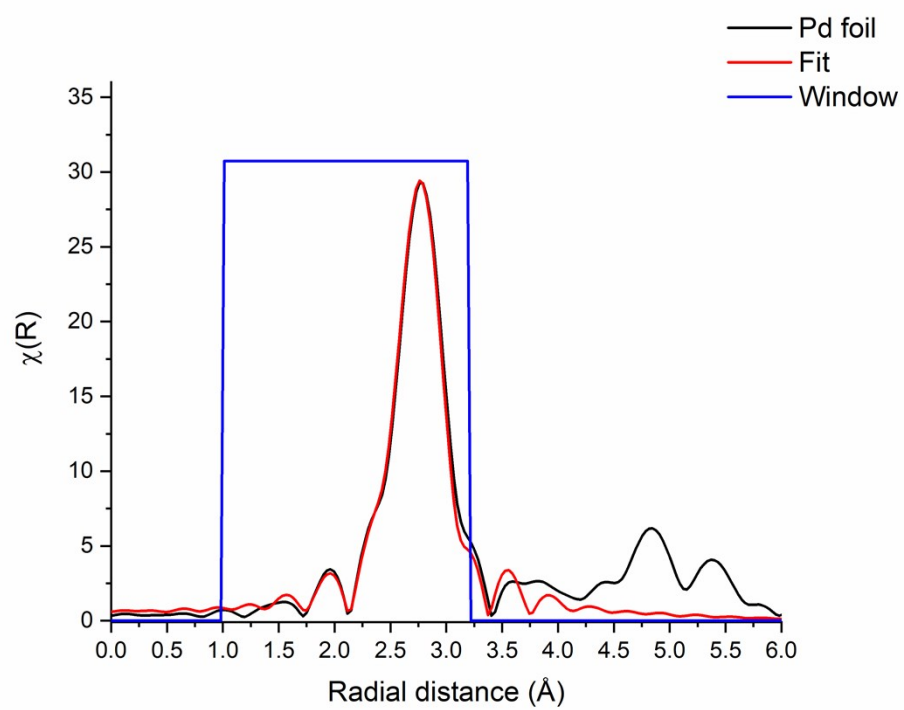

Figure S2. Pd K-edge EXAFS fit for Pd foil.

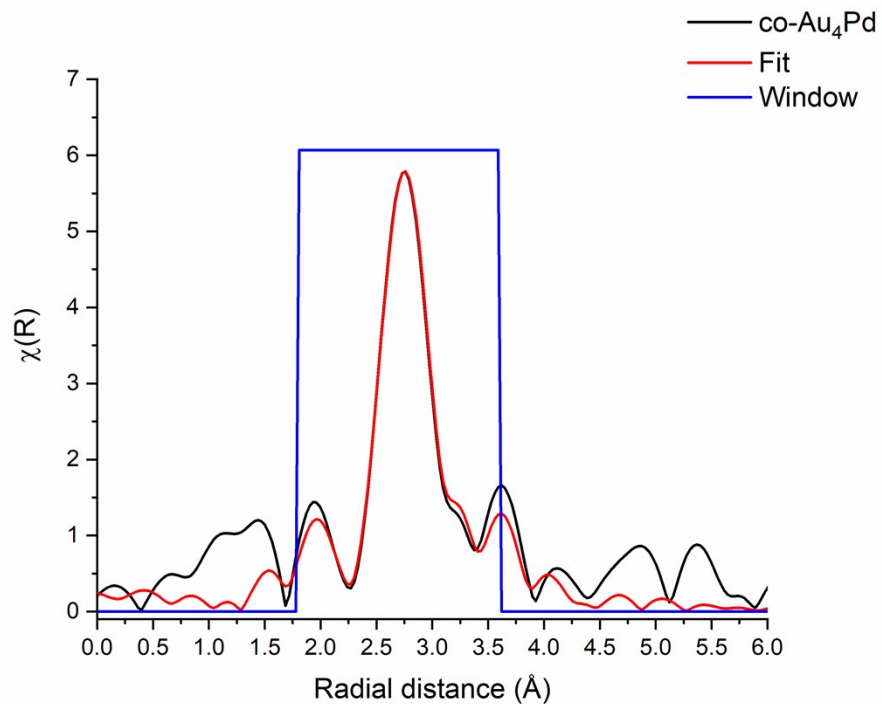

Figure S3. Pd K-edge EXAFS fit for co-Au<sub>4</sub>Pd.

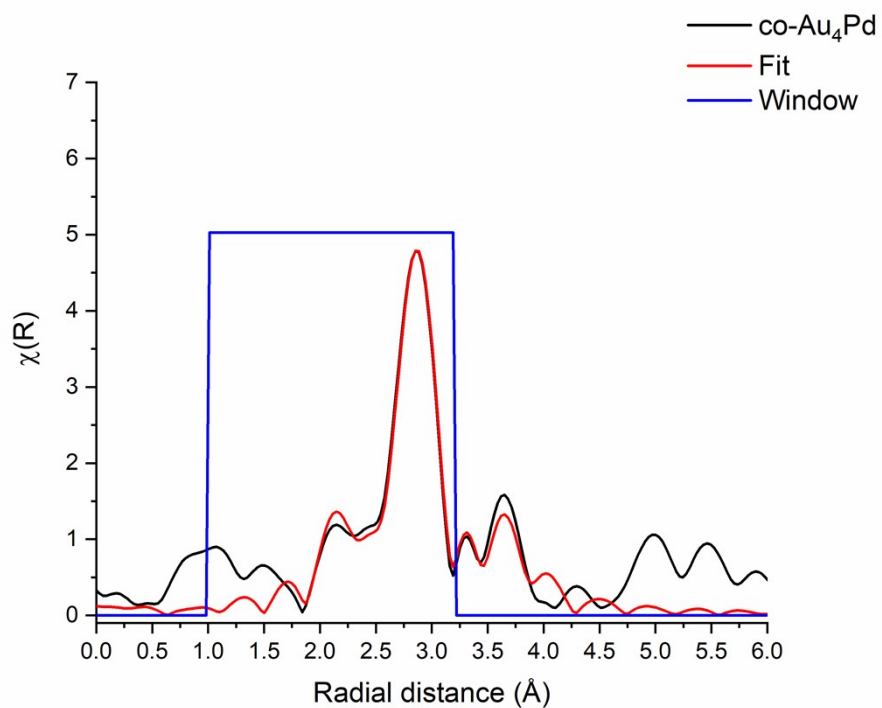

Figure S4. Au L<sub>III</sub>-edge EXAFS fit for co-Au<sub>4</sub>Pd.

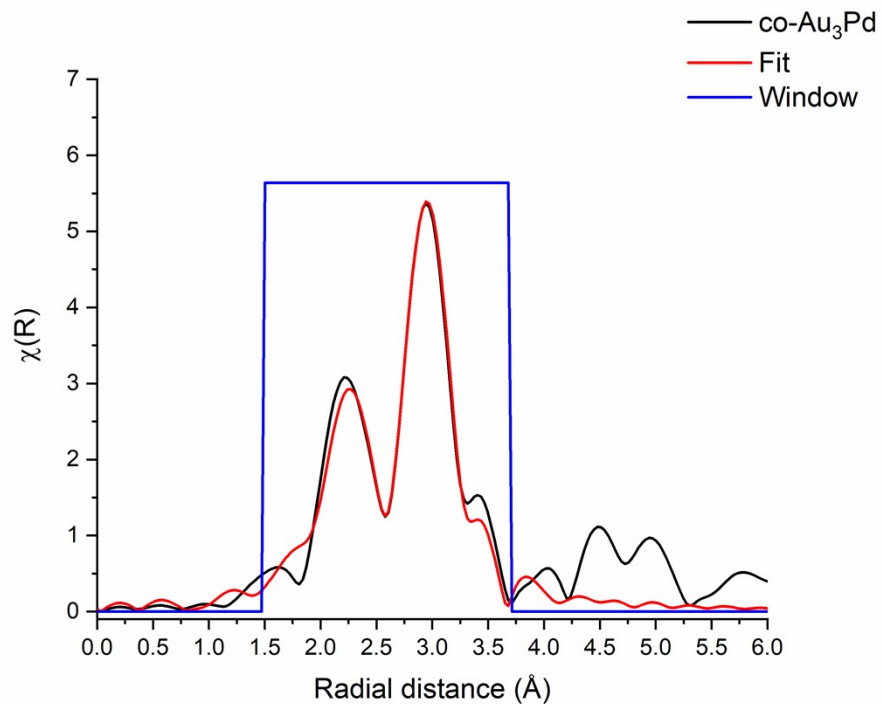

Figure S5. Pd K-edge EXAFS fit for co-Au<sub>3</sub>Pd.

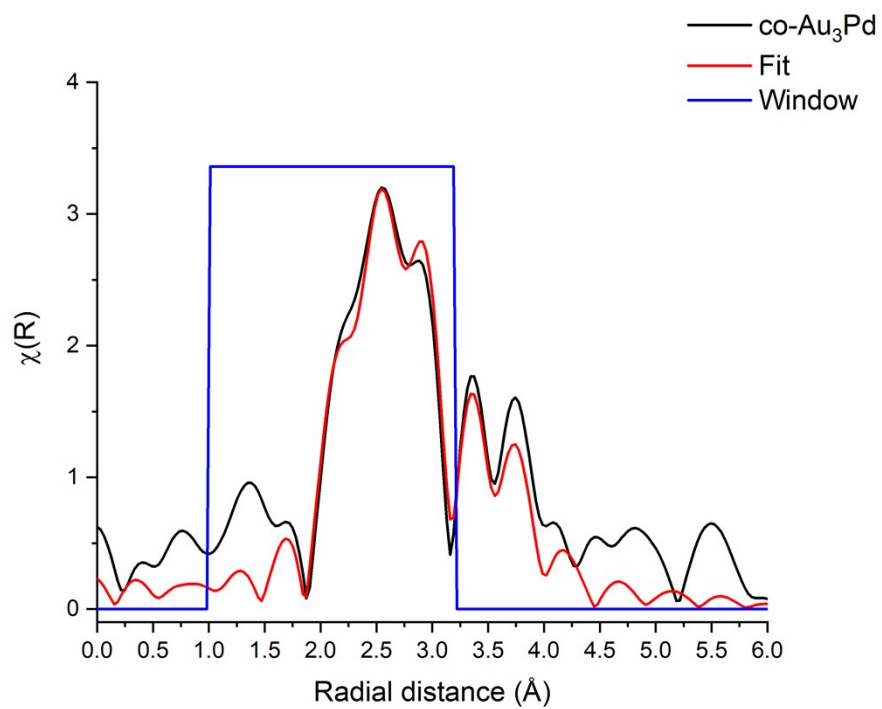

Figure S6. Au L<sub>III</sub>-edge EXAFS fit for co-Au<sub>3</sub>Pd.

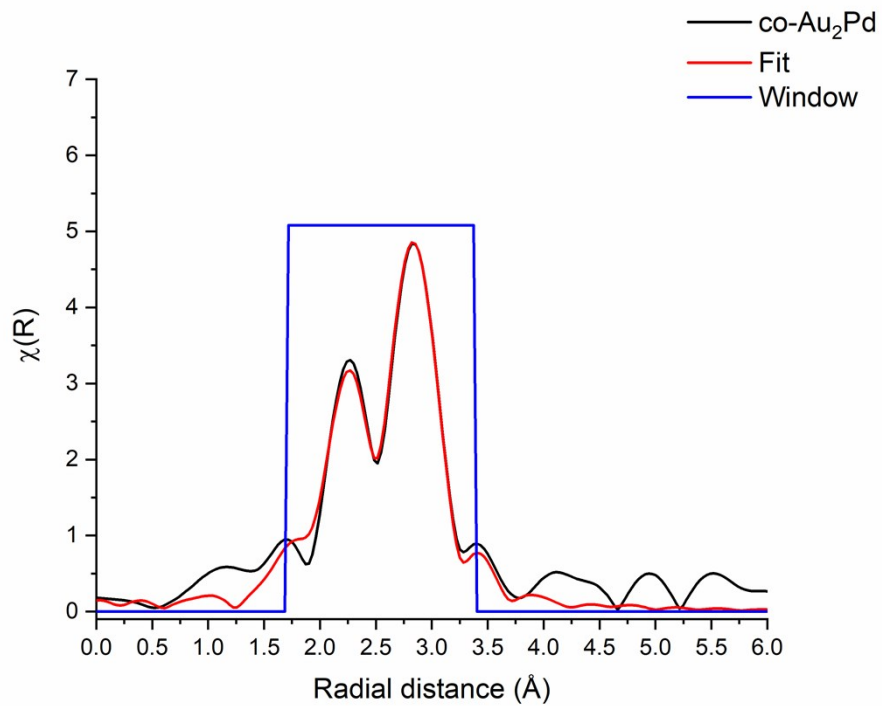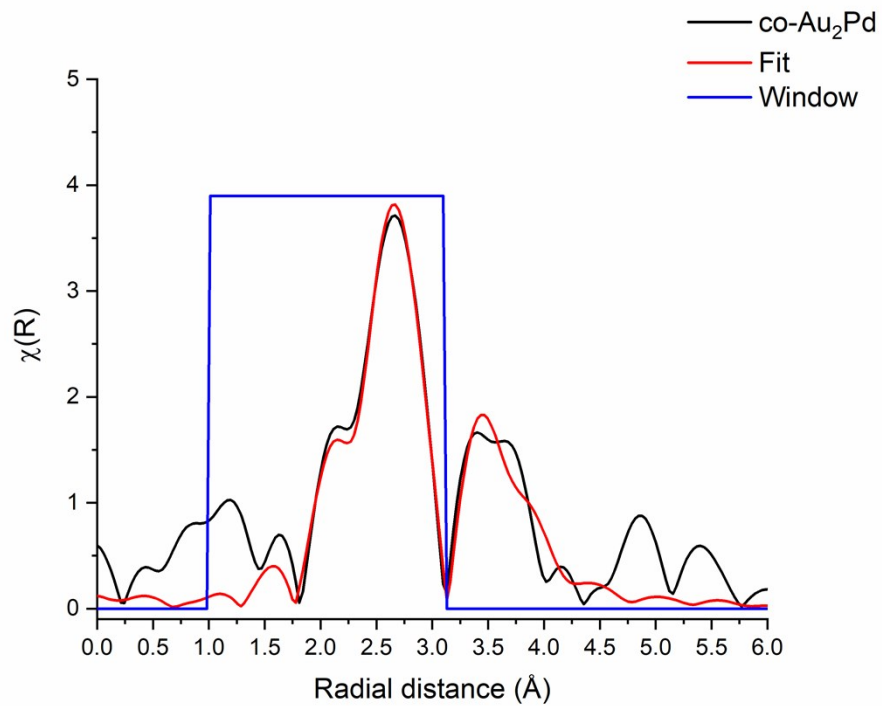

Figure S7. Pd K-edge EXAFS fit for co-Au<sub>2</sub>Pd.

Figure S8. Au L<sub>III</sub>-edge EXAFS fit for co-Au<sub>2</sub>Pd.

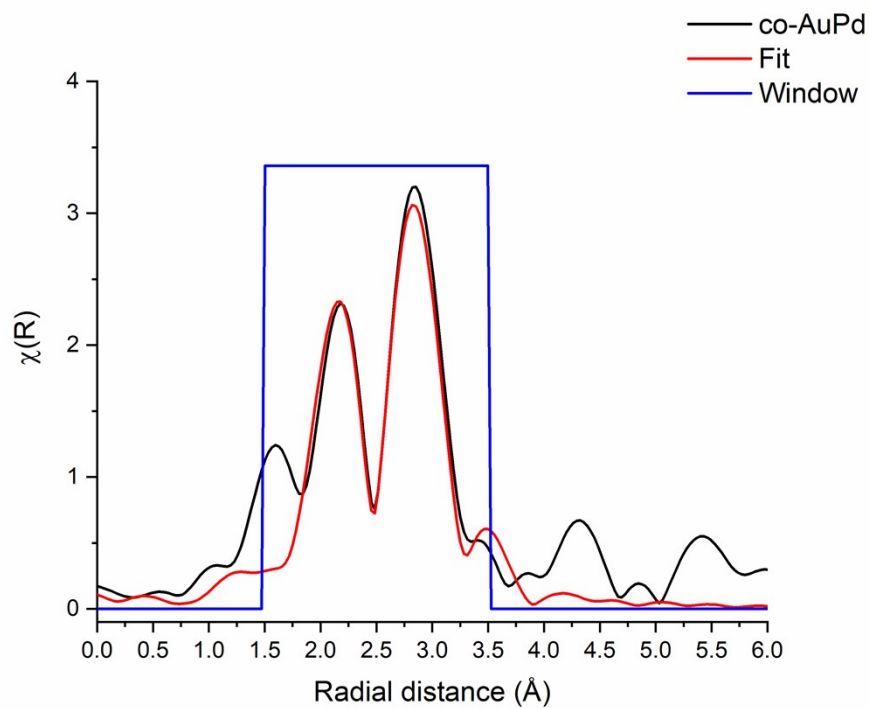

Figure S9. Pd K-edge EXAFS fit for co-AuPd.

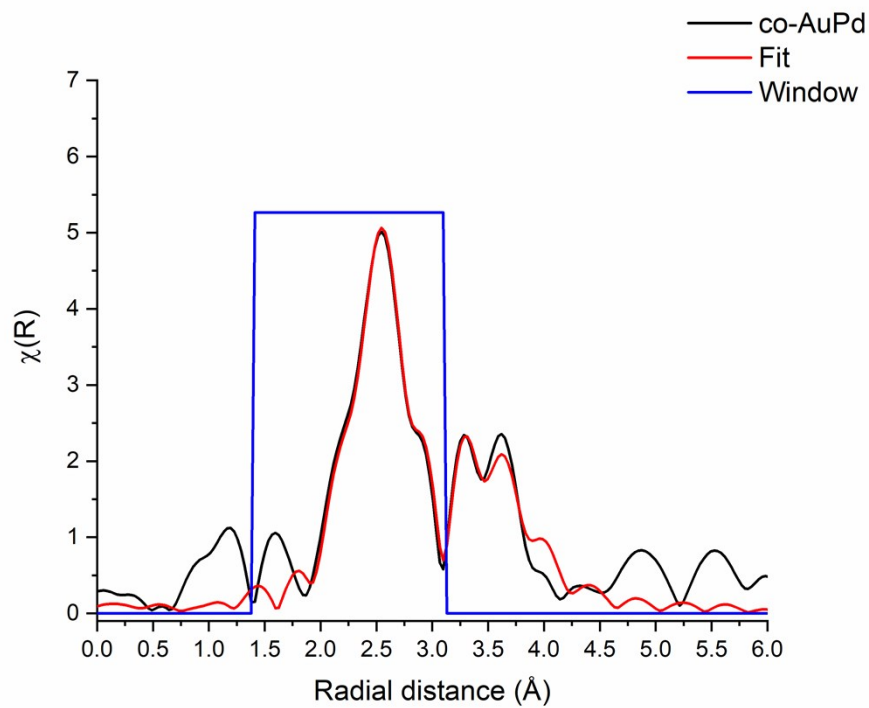

Figure S10. Au L<sub>III</sub>-edge EXAFS fit for co-AuPd.

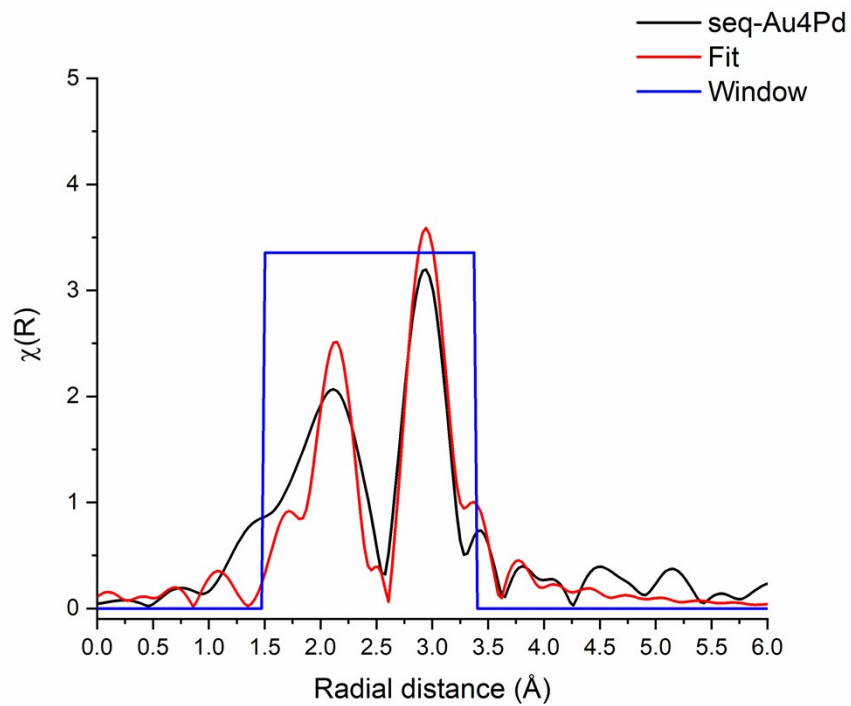

Figure S11. Pd K-edge EXAFS fit for seq-Au<sub>4</sub>Pd.

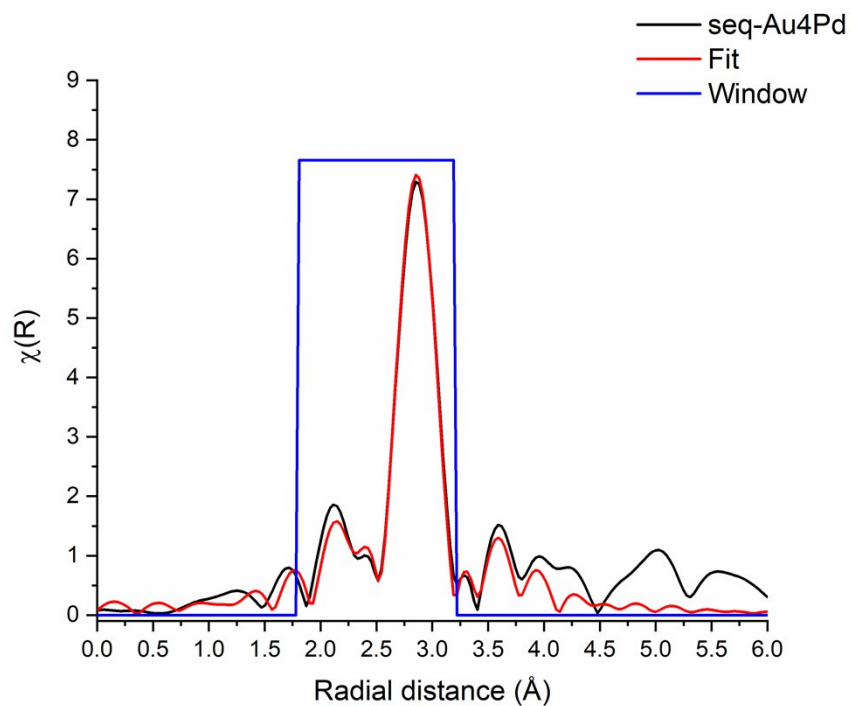

Figure S12. Au L<sub>III</sub>-edge EXAFS fit for seq-Au<sub>4</sub>Pd.



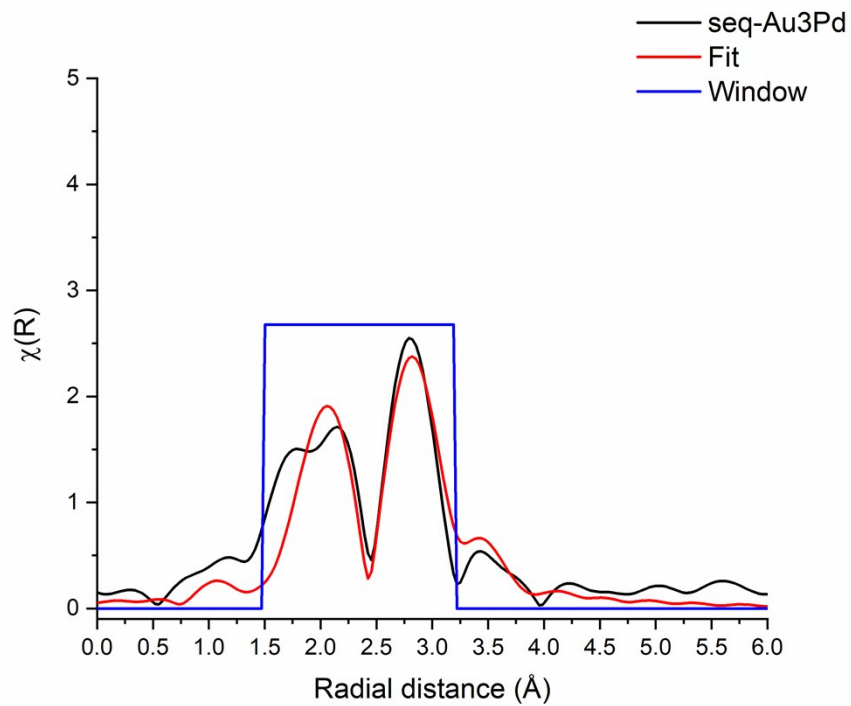

Figure S13. Pd K-edge EXAFS fit for seq-Au<sub>3</sub>Pd.

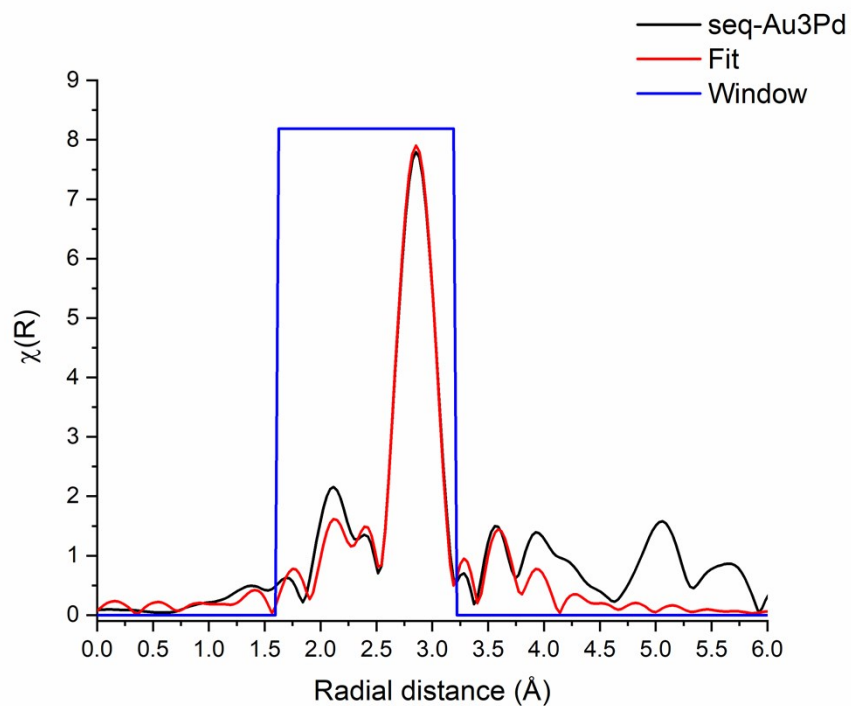

Figure S14. Au L<sub>III</sub>-edge EXAFS fit for seq-Au<sub>3</sub>Pd.

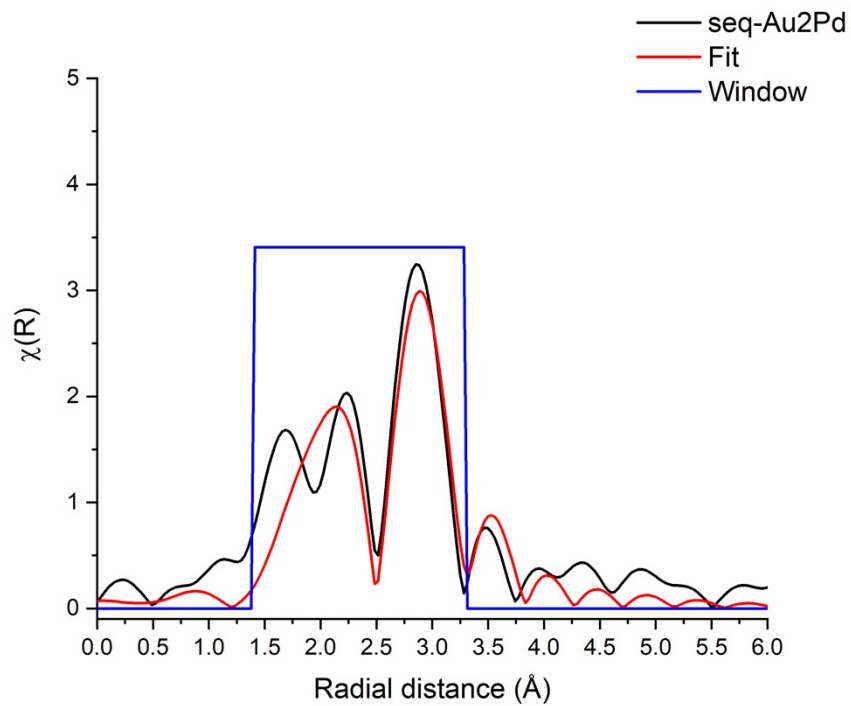

Figure S15. Pd K-edge EXAFS fit for seq-Au<sub>2</sub>Pd.

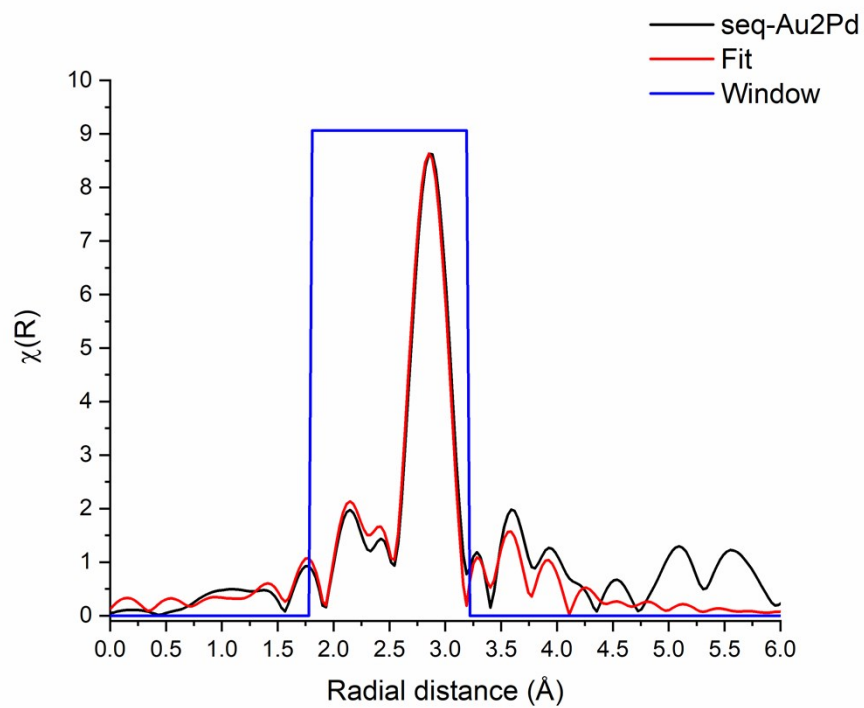

Figure S16. Au L<sub>III</sub>-edge EXAFS fit for seq-Au<sub>2</sub>Pd.

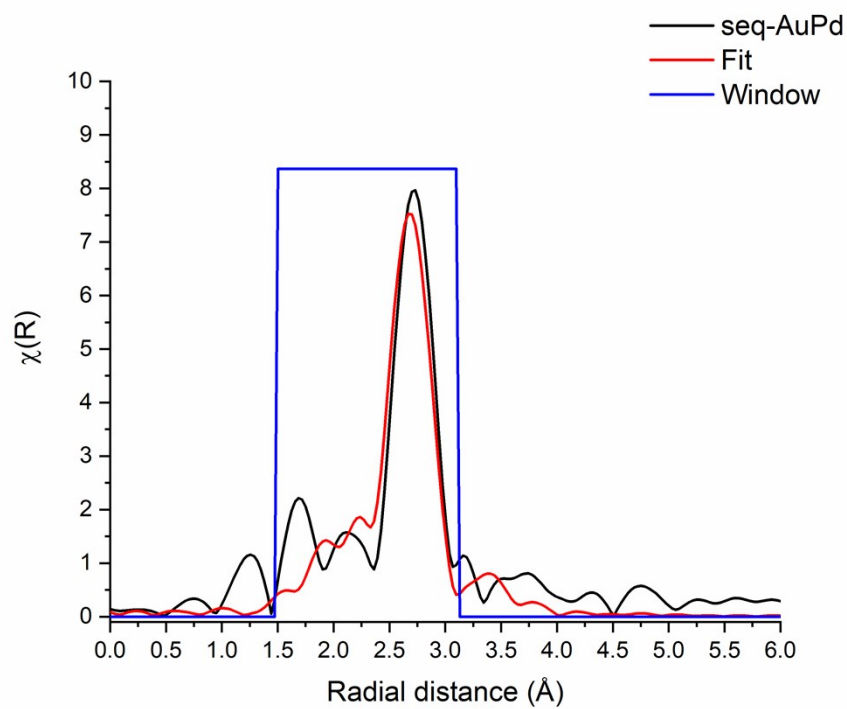

Figure S17. Pd K-edge EXAFS fit for seq-AuPd.

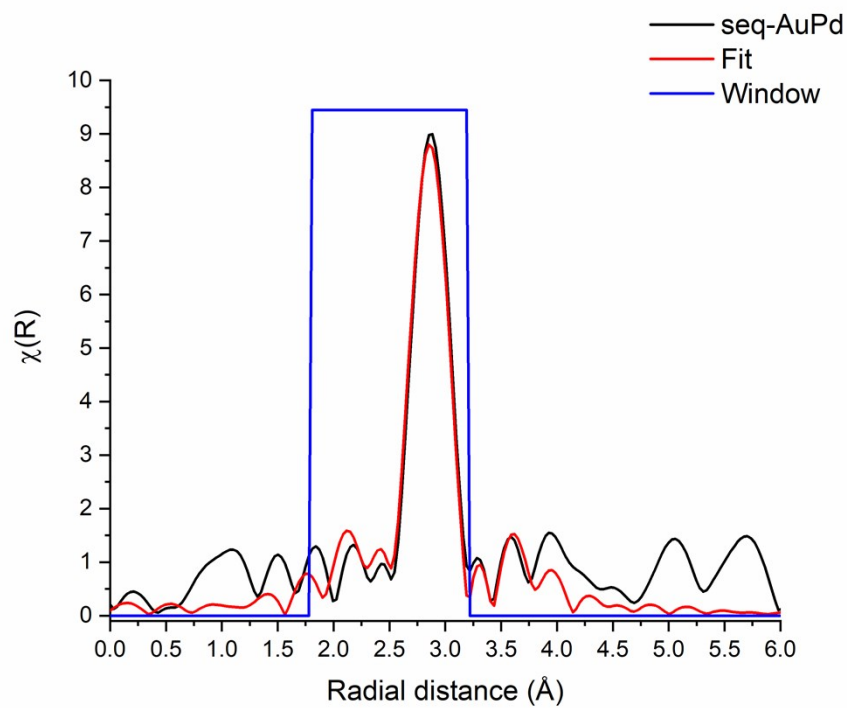

Figure S18. Au L<sub>III</sub>-edge EXAFS fit for seq-AuPd.
